# Supplementary material for: Plant Growth-Promoting Rhizobacteria Inoculation to Enhance Vegetative Growth, Nitrogen Fixation and Nitrogen Remobilisation of Maize under Greenhouse Conditions
Source: PubMed Central journal article supplement (PMC4807084; doi:10.1371/journal.pone.0152478), 2016-03-24
Supplement: pone.0152478.s001.pdf [file pone.0152478.s001.pdf]

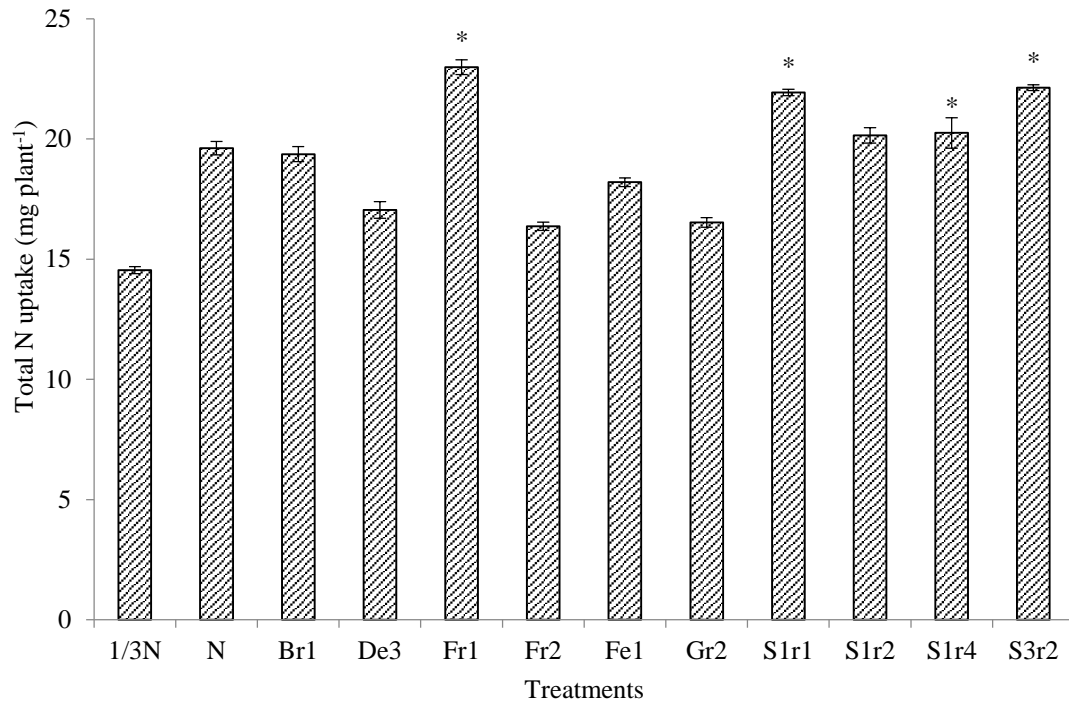

**S1 Fig. Effects of preliminary PGPR inoculation on total N uptake of maize.** Asterisk,\* on a bar indicates significant difference by Dunnett's test (Uninoculated 1/3 N control) at  $p < 0.05$ . Error bar indicates standard errors.
