# Supplementary material for: Plant Growth-Promoting Rhizobacteria Inoculation to Enhance Vegetative Growth, Nitrogen Fixation and Nitrogen Remobilisation of Maize under Greenhouse Conditions
Source: PubMed Central journal article supplement (PMC4807084; doi:10.1371/journal.pone.0152478), 2016-03-24
Supplement: pone.0152478.s003.pdf [file pone.0152478.s003.pdf]

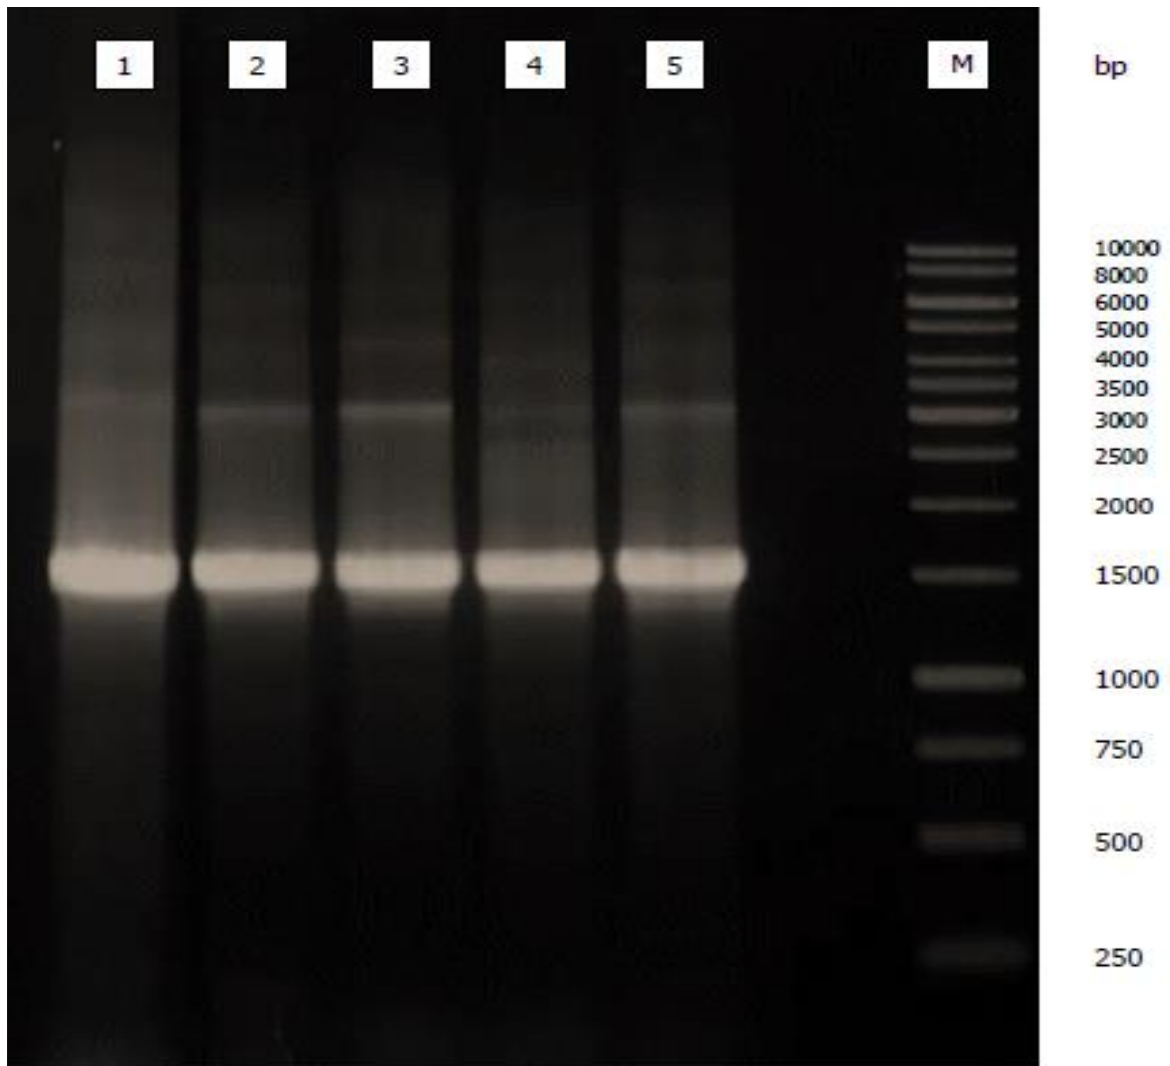

**S3 Fig. Red-gel stained 1% agarose gel displaying amplified DNA products under UV-transilluminator.** Lanes: 1, Fr1 DNA; 2, S1r1 DNA; 3, S3r2 DNA; 4, Br1 DNA; 5, UPMB10 DNA; M, 1kb DNA ladder (Fermentas GeneRuler™).
