# Supplementary material for: Plant Growth-Promoting Rhizobacteria Inoculation to Enhance Vegetative Growth, Nitrogen Fixation and Nitrogen Remobilisation of Maize under Greenhouse Conditions
Source: PubMed Central journal article supplement (PMC4807084; doi:10.1371/journal.pone.0152478), 2016-03-24
Supplement: pone.0152478.s004.pdf [file pone.0152478.s004.pdf]

**S1 Table. ANOVA Output of total N uptake in plant top and in different parts of maize inoculated with PGPR at D<sub>50</sub> and D<sub>65</sub> harvests.**

| Tassel      |    |          |             |         |        |
|-------------|----|----------|-------------|---------|--------|
| Source      | DF | Anova SS | Mean Square | F Value | Pr > F |
| Block       | 3  | 7955.063 | 2651.688    | 14.11   | <.0001 |
| Treatment   | 5  | 9861.354 | 1972.271    | 10.49   | <.0001 |
| D           | 1  | 19642.52 | 19642.52    | 104.49  | <.0001 |
| Treatment*D | 5  | 3843.354 | 768.6708    | 4.09    | 0.0053 |

  

| Young leaves |    |          |             |         |        |
|--------------|----|----------|-------------|---------|--------|
| Source       | DF | Anova SS | Mean Square | F Value | Pr > F |
| Block        | 3  | 17925.08 | 5975.028    | 8.42    | 0.0003 |
| Treatment    | 5  | 47713.92 | 9542.783    | 13.45   | <.0001 |
| D            | 1  | 21000.33 | 21000.33    | 29.61   | <.0001 |
| Treatment*D  | 5  | 2871.667 | 574.3333    | 0.81    | 0.5511 |

  

| Ear leaves  |    |          |             |         |        |
|-------------|----|----------|-------------|---------|--------|
| Source      | DF | Anova SS | Mean Square | F Value | Pr > F |
| Block       | 3  | 17455.58 | 5818.528    | 12.18   | <.0001 |
| Treatment   | 5  | 35057.92 | 7011.583    | 14.68   | <.0001 |
| D           | 1  | 645.3333 | 645.3333    | 1.35    | 0.2535 |
| Treatment*D | 5  | 3497.167 | 699.4333    | 1.46    | 0.2281 |

  

| Old leaves  |    |          |             |         |        |
|-------------|----|----------|-------------|---------|--------|
| Source      | DF | Anova SS | Mean Square | F Value | Pr > F |
| Block       | 3  | 619.8958 | 206.6319    | 0.29    | 0.8351 |
| Treatment   | 5  | 38178.44 | 7635.688    | 10.57   | <.0001 |
| D           | 1  | 346.6875 | 346.6875    | 0.48    | 0.4933 |
| Treatment*D | 5  | 950.4375 | 190.0875    | 0.26    | 0.9299 |

  

| Stalk       |    |          |             |         |        |
|-------------|----|----------|-------------|---------|--------|
| Source      | DF | Anova SS | Mean Square | F Value | Pr > F |
| Block       | 3  | 5474.063 | 1824.688    | 1.93    | 0.1445 |
| Treatment   | 5  | 41735.44 | 8347.088    | 8.81    | <.0001 |
| D           | 1  | 106879.7 | 106879.7    | 112.85  | <.0001 |
| Treatment*D | 5  | 4499.438 | 899.8875    | 0.95    | 0.4621 |

  

| Plant top   |    |          |             |         |        |
|-------------|----|----------|-------------|---------|--------|
| Source      | DF | Anova SS | Mean Square | F Value | Pr > F |
| Block       | 3  | 197194.1 | 65731.35    | 22.36   | <.0001 |
| Treatment   | 5  | 951914.4 | 190382.9    | 64.75   | <.0001 |
| D           | 1  | 931582.7 | 931582.7    | 316.83  | <.0001 |
| Treatment*D | 5  | 40739.19 | 8147.838    | 2.77    | 0.0338 |
