# Supplementary material for: Plant Growth-Promoting Rhizobacteria Inoculation to Enhance Vegetative Growth, Nitrogen Fixation and Nitrogen Remobilisation of Maize under Greenhouse Conditions
Source: PubMed Central journal article supplement (PMC4807084; doi:10.1371/journal.pone.0152478), 2016-03-24
Supplement: pone.0152478.s005.pdf [file pone.0152478.s005.pdf]

**S2 Table. ANOVA Output of at. %  $^{15}\text{N}_e$  in plant top and in different parts of maize inoculated with PGPR at D<sub>50</sub> and D<sub>65</sub> harvests.**

| Tassel       |    |          |             |         |        |
|--------------|----|----------|-------------|---------|--------|
| Source       | DF | Anova SS | Mean Square | F Value | Pr > F |
| Block        | 3  | 0.012147 | 0.004049    | 4.28    | 0.0117 |
| Treatment    | 5  | 0.153147 | 0.030629    | 32.38   | <.0001 |
| D            | 1  | 0.014981 | 0.014981    | 15.84   | 0.0004 |
| Treatment*D  | 5  | 0.040344 | 0.008069    | 8.53    | <.0001 |
| Young leaves |    |          |             |         |        |
| Source       | DF | Anova SS | Mean Square | F Value | Pr > F |
| Block        | 3  | 0.012669 | 0.004223    | 1.91    | 0.1471 |
| Treatment    | 5  | 0.603509 | 0.120702    | 54.61   | <.0001 |
| D            | 1  | 0.014456 | 0.014456    | 6.54    | 0.0153 |
| Treatment*D  | 5  | 0.05342  | 0.010684    | 4.83    | 0.002  |
| Ear leaves   |    |          |             |         |        |
| Source       | DF | Anova SS | Mean Square | F Value | Pr > F |
| Block        | 3  | 0.006801 | 0.002267    | 0.79    | 0.5076 |
| Treatment    | 5  | 1.178573 | 0.235715    | 82.26   | <.0001 |
| D            | 1  | 0.333667 | 0.333667    | 116.44  | <.0001 |
| Treatment*D  | 5  | 0.027611 | 0.005522    | 1.93    | 0.1163 |
| Old leaves   |    |          |             |         |        |
| Source       | DF | Anova SS | Mean Square | F Value | Pr > F |
| Block        | 3  | 0.025927 | 0.008642    | 1.73    | 0.1795 |
| Treatment    | 5  | 1.430481 | 0.286096    | 57.34   | <.0001 |
| D            | 1  | 0.061992 | 0.061992    | 12.42   | 0.0013 |
| Treatment*D  | 5  | 0.04049  | 0.008098    | 1.62    | 0.1813 |
| Stalk        |    |          |             |         |        |
| Source       | DF | Anova SS | Mean Square | F Value | Pr > F |
| Block        | 3  | 0.012777 | 0.004259    | 1.26    | 0.3027 |
| Treatment    | 5  | 0.202437 | 0.040487    | 12.02   | <.0001 |
| D            | 1  | 0.006745 | 0.006745    | 2       | 0.1665 |
| Treatment*D  | 5  | 0.006196 | 0.001239    | 0.37    | 0.8669 |
| Plant top    |    |          |             |         |        |
| Source       | DF | Anova SS | Mean Square | F Value | Pr > F |
| Block        | 3  | 0.000268 | 8.93E-05    | 0.24    | 0.8699 |
| Treatment    | 5  | 0.614593 | 0.122919    | 326.26  | <.0001 |
| D            | 1  | 0.107352 | 0.107352    | 284.94  | <.0001 |
| Treatment*D  | 5  | 0.012611 | 0.002522    | 6.69    | 0.0002 |
